# Supplementary material
Source: PubMed Central journal article supplement (PMC3629782)
Supplement: Supp_Fig1.pdf [file Supp_Fig1.pdf]

## Supplementary Data

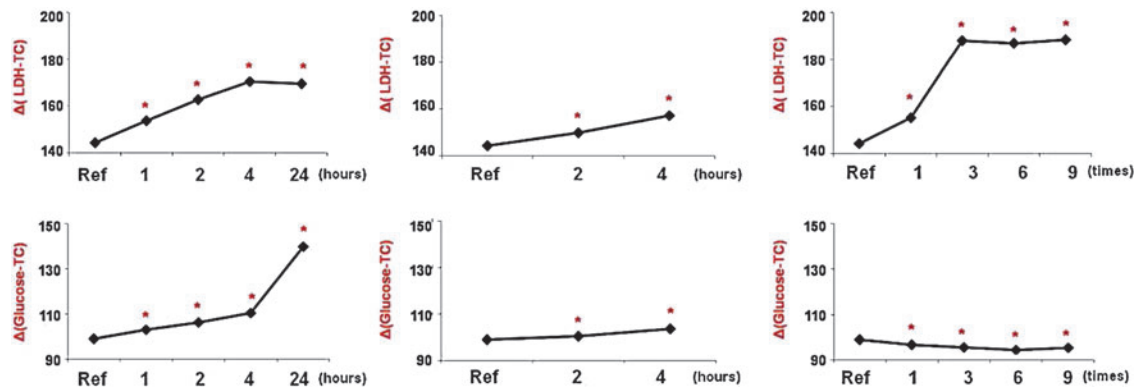

**SUPPLEMENTARY FIG. S1.** Representative, normalized biomarkers ( $\Delta$  [LDH-TC]) and  $\Delta$ [glucose-TC]) showed significant ( $p < 0.05$ ) differences that were dependent on specific pre-analytical conditions. In particular,  $\Delta$ (glucose-TC) was used to determine sample quality, while  $\Delta$ (LDH-TC) was used to determine the effects of freeze-thaw repetition.
