# Supplementary material
Source: PubMed Central journal article supplement (PMC3629782)
Supplement: Supp_Table1.pdf [file Supp_Table1.pdf]

SUPPLEMENTARY TABLE S1. DEFINED CONDITIONS USED FOR STUDYING THE EFFECTS OF PRE-ANALYTICAL METHODS

|                       | <i>Factor</i>           | <i>Determinants</i>     |
|-----------------------|-------------------------|-------------------------|
| Collection condition* | Delayed separation time | 0.5, 1, 2, 4, 24 (h)    |
|                       | Delayed freezing time   | 0.5, 2, 4 (h)           |
| Storage condition     | Freeze/thaw cycles      | 0, 1, 3, 6, 10 (cycles) |

\*At room temperature until processing or freezing.
