# Supplementary material
Source: PubMed Central journal article supplement (PMC3629782)
Supplement: Supp_Table2.pdf [file Supp_Table2.pdf]

SUPPLEMENTARY TABLE S2. ASSAY METHODS AND AVERAGE RANGE FOR 10 BIOCHEMICAL ANALYTES

| <i>Analytes</i> | <i>Analytic method</i>         | <i>Concentration</i>                     |
|-----------------|--------------------------------|------------------------------------------|
| ALT             | Enzymatic method               | < 43 IU/L                                |
| AST             | Enzymatic method               | < 38 IU/L                                |
| GGT             | (IFCC)                         | 11–50 IU/L                               |
| LDH             | Enzymatic method               | 300–460 IU/L                             |
| TG              | Enzymatic method (GPO)         | < 150 mg/dL                              |
| TC              | Enzymatic method               | 130–220 mg/dL                            |
| CRP             | Latex Tubidmetry immuno method | < 3 mg/dL                                |
| BUN             | Uricase-GIDH method            | 5–23 mg/dL                               |
| Creatinine      | Jaffer reaction method         | Man: 0.6–1.4 mg/dL<br>Woman: 0.5–1 mg/dL |
| Glucose         | Hexokinase method              | 60–115 mg/dL                             |
