# Supplementary material
Source: PubMed Central journal article supplement (PMC3629782)
Supplement: Supp_Table3.pdf [file Supp_Table3.pdf]

SUPPLEMENTARY TABLE S3. CONCENTRATION OF 10 ANALYTES IN PLASMA ACCORDING TO REPEATED FREEZE/THAW

|                               | AST          | ALT          | GGT          | LDH           | TG            | TC            | CRP         | BUN          | Creatinine  | Glucose      |
|-------------------------------|--------------|--------------|--------------|---------------|---------------|---------------|-------------|--------------|-------------|--------------|
| Ref                           | 32.59        | 28.58        | 29.14        | 522.35        | 113.87        | 189.26        | 0.20        | 14.56        | 0.97        | 94.54        |
| USD                           | 0.95         | 0.50         | 0.503        | 4.53          | 1.23          | 2.39          | 0.01        | 0.25         | 0.03        | 1.27         |
| SCL range*                    | 29.92-35.27  | 27.17-29.99  | 27.73-30.55  | 509.65-535.04 | 110.43-117.30 | 182.56-195.96 | 0.18-0.21   | 13.86-15.26  | 0.89-1.06   | 90.99-98.09  |
| Unit                          | U/L          | U/L          | U/L          | U/L           | mg/dL         | mg/dL         | mg/dL       | mg/dL        | mg/dL       | mg/dL        |
| Numbers of freeze/thaw cycles |              |              |              |               |               |               |             |              |             |              |
| 3                             | 32.26 ± 0.58 | 27.70 ± 0.58 | 28.90 ± 0.53 | 592.55 ± 6.06 | 112.44 ± 1.23 | 188.13 ± 1.85 | 0.20 ± 0.00 | 14.67 ± 0.24 | 0.96 ± 0.03 | 93.93 ± 1.13 |
| 6                             | 32.01 ± 0.61 | 26.65 ± 0.37 | 28.84 ± 0.54 | 586.95 ± 4.91 | 112.43 ± 1.42 | 188.71 ± 2.07 | 0.19 ± 0.00 | 14.55 ± 0.29 | 0.95 ± 0.03 | 95.05 ± 1.67 |
| 9                             | 32.03 ± 0.67 | 26.57 ± 0.33 | 28.58 ± 0.50 | 583.82 ± 4.08 | 112.44 ± 1.69 | 190.60 ± 2.58 | 0.19 ± 0.00 | 14.64 ± 0.16 | 0.96 ± 0.03 | 96.25 ± 1.59 |

\*Mean value of reference ± (2.8 × USD); †Excess over the SCL range; ‡Statistically significant difference from reference (repeated-measure ANOVA,  $p < 0.05$ ).
